# Supplementary material for: Automated sentiment analysis of visually impaired students’ audio feedback in virtual learning environments
Source: PeerJ journal article supplement (doi:10.7717/peerj-cs.2143), 2024-06-24
Supplement: regression.doc.pdf [file regression.doc.pdf]

## Logistic Regression

### Notes

|                        |                                |                                                                                                                                                                                                                                                                                                    |
|------------------------|--------------------------------|----------------------------------------------------------------------------------------------------------------------------------------------------------------------------------------------------------------------------------------------------------------------------------------------------|
| Output Created         |                                | 05-MAY-2024 02:56:38                                                                                                                                                                                                                                                                               |
| Comments               |                                |                                                                                                                                                                                                                                                                                                    |
| Input                  | Data                           | C:\prof.doaa\new doaa\تحليل الانفعالات\STATISTICS<br>NEW\data-corellationa_rsqu<br>re.sav                                                                                                                                                                                                          |
|                        | Active Dataset                 | DataSet1                                                                                                                                                                                                                                                                                           |
|                        | Filter                         | <none>                                                                                                                                                                                                                                                                                             |
|                        | Weight                         | <none>                                                                                                                                                                                                                                                                                             |
|                        | Split File                     | <none>                                                                                                                                                                                                                                                                                             |
|                        | N of Rows in Working Data File | 100                                                                                                                                                                                                                                                                                                |
| Missing Value Handling | Definition of Missing          | User-defined missing values are treated as missing                                                                                                                                                                                                                                                 |
| Syntax                 |                                | LOGISTIC REGRESSION<br>VARIABLES results<br>/METHOD=ENTER<br>Homework_grade<br>Homework_click Attendance<br>Discussion<br>Hight_Positive_post<br>Positive_post<br>Natural_post Negative_post<br>Hight_Negative_post<br>/PRINT=CI(95)<br>/CRITERIA=PIN(0.05)<br>POUT(0.10) ITERATE(20)<br>CUT(0.5). |
| Resources              | Processor Time                 | 00:00:00.02                                                                                                                                                                                                                                                                                        |
|                        | Elapsed Time                   | 00:00:00.04                                                                                                                                                                                                                                                                                        |

### Warnings

Due to redundancies, degrees of freedom have been reduced for one or more variables.

---

### Case Processing Summary

| Unweighted Cases <sup>a</sup> |                      | N   | Percent |
|-------------------------------|----------------------|-----|---------|
| Selected Cases                | Included in Analysis | 100 | 100.0   |
|                               | Missing Cases        | 0   | .0      |
|                               | Total                | 100 | 100.0   |
| Unselected Cases              |                      | 0   | .0      |
| Total                         |                      | 100 | 100.0   |

a. If weight is in effect, see classification table for the total number of cases.

### Dependent Variable

#### Encoding

| Original Value | Internal Value |
|----------------|----------------|
| F              | 0              |
| T              | 1              |

### Block 0: Beginning Block

### Classification Table<sup>a,b</sup>

|          |         |        | Predicted |       | Percentage Correct |
|----------|---------|--------|-----------|-------|--------------------|
|          |         |        | results   |       |                    |
| Observed | results | F      | T         |       |                    |
|          |         | Step 0 | F         | 0     | 15                 |
|          | T       | 0      | 85        | 100.0 |                    |

|                    |  |  |      |
|--------------------|--|--|------|
| Overall Percentage |  |  | 85.0 |
|--------------------|--|--|------|

- a. Constant is included in the model.
- b. The cut value is .500

### Variables in the Equation

|        |          | B     | S.E. | Wald   | df | Sig. | Exp(B) |
|--------|----------|-------|------|--------|----|------|--------|
| Step 0 | Constant | 1.735 | .280 | 38.363 | 1  | .000 | 5.667  |

### Variables not in the Equation<sup>a</sup>

|        |           |                     | Score  | df | Sig. |
|--------|-----------|---------------------|--------|----|------|
| Step 0 | Variables | Homework_grade      | 14.805 | 1  | .000 |
|        |           | Homework_click      | 7.704  | 1  | .006 |
|        |           | Attendance          | 16.153 | 1  | .000 |
|        |           | Discussion          | 3.505  | 1  | .061 |
|        |           | Hight_Positive_post | 27.204 | 1  | .000 |
|        |           | Positive_post       | 13.512 | 1  | .000 |
|        |           | Natural_post        | 10.776 | 1  | .001 |
|        |           | Negative_post       | 11.665 | 1  | .001 |
|        |           | Hight_Negative_post | 7.113  | 1  | .008 |

- a. Residual Chi-Squares are not computed because of redundancies.

## Block 1: Method = Enter

### Omnibus Tests of Model Coefficients

|        |       | Chi-square | df | Sig. |
|--------|-------|------------|----|------|
| Step 1 | Step  | 84.542     | 8  | .000 |
|        | Block | 84.542     | 8  | .000 |
|        | Model | 84.542     | 8  | .000 |



|               |             |               |      |   |       |  |  |  |
|---------------|-------------|---------------|------|---|-------|--|--|--|
| Natural_post  | -12.79<br>2 | 9498.86<br>8  | .000 | 1 | .999  |  |  |  |
| Negative_post | -9.773      | 16663.7<br>28 | .000 | 1 | 1.000 |  |  |  |
| Constant      | 51.000      | 10206.8<br>30 | .000 | 1 | .996  |  |  |  |
