# Supplementary material for: Automated sentiment analysis of visually impaired students’ audio feedback in virtual learning environments
Source: PeerJ journal article supplement (doi:10.7717/peerj-cs.2143), 2024-06-24
Supplement: sharts.xlsx [file sharts.xlsx]

## Sheet: structued_unstructed-CNN-SVM
f-measure	4th Week	9th Week
Structured and Unstructured Data (SVM)	0.85	0.89
Structured andUnstructured Data (CNN)	0.86	0.92

## Sheet: unstructed-data
f-measure	4th Weak	9th Weak
SVM	0.76	0.82
CNN	0.85	0.91

## Sheet: structed-data
f-measure	4th Weak	9th Weak
SVM	0.76	0.87
CNN	0.79	0.88

## Sheet: structed-cnn&stru-unstru-cnn
f-measure	4th Week	9th Week
Structured Data Only-CNN	0.79	0.82
Structured and Unstructured Data-CNN	0.86	0.92
